# Supplementary material
Source: PubMed Central journal article supplement (PMC8251662)
Supplement: NIHMS1718953-supplement-Supplementary_Information.pdf [file NIHMS1718953-supplement-Supplementary_Information.pdf]

## Supplementary information

# Ultrasmall Molybdenum Disulfide Quantum Dots Cage Alzheimer's Amyloid Beta to Restore Membrane Fluidity

Yuhuan Li,<sup>1,2</sup> Huayuan Tang,<sup>3</sup> Houjuan Zhu,<sup>4</sup> Aleksandr Kakinen,<sup>5</sup> Di Wang,<sup>6</sup> Nicholas Andrikopoulos,<sup>2</sup> Yunxiang Sun,<sup>7</sup> Aparna Nandakumar,<sup>2</sup> Eunbi Kwak,<sup>2</sup> Thomas P. Davis,<sup>2,5</sup> David Tai Leong,<sup>4\*</sup> Feng Ding<sup>3\*</sup> and Pu Chun Ke<sup>2,5,8\*</sup>

<sup>1</sup>Liver Cancer Institute, Zhongshan Hospital, Key Laboratory of Carcinogenesis and Cancer Invasion, Ministry of Education, Fudan University, Shanghai, 200032, China

<sup>2</sup>Drug Delivery, Disposition and Dynamics, Monash Institute of Pharmaceutical Sciences, Monash University, 381 Royal Parade, Parkville, VIC 3052, Australia

<sup>3</sup>Department of Physics and Astronomy, Clemson University, Clemson, SC 29634, United States

<sup>4</sup>National University of Singapore, Department of Chemical and Biomolecular Engineering, 4 Engineering Drive 4, Singapore 117585, Singapore

<sup>5</sup>Australian Institute for Bioengineering and Nanotechnology, The University of Queensland, Brisbane Qld 4072, Australia

<sup>6</sup>School of Life Sciences, Jilin University, Changchun 130012, China

<sup>7</sup>School of Physical Science and Technology, Ningbo University, Ningbo 315211, China

<sup>8</sup>The GBA National Institute for Nanotechnology Innovation, 136 Kaiyuan Avenue, Guangzhou, 510700, China

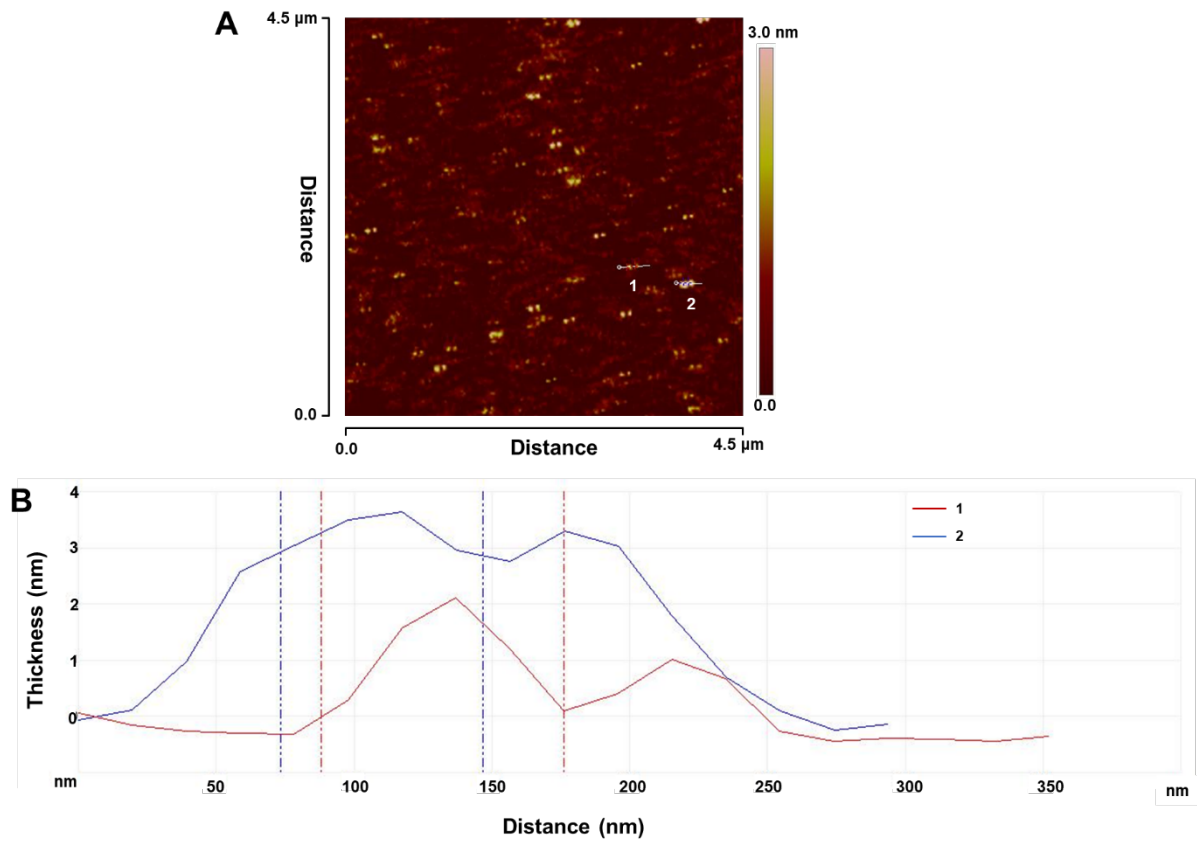

**Figure S1.** AFM measurement for the thickness of ultrasmall MoS<sub>2</sub> QDs. (A) AFM imaging of ultrasmall MoS<sub>2</sub> QDs. (B) Thickness analysis of ultrasmall MoS<sub>2</sub> QDs for cross-sections 1 and 2 selected from panel A.

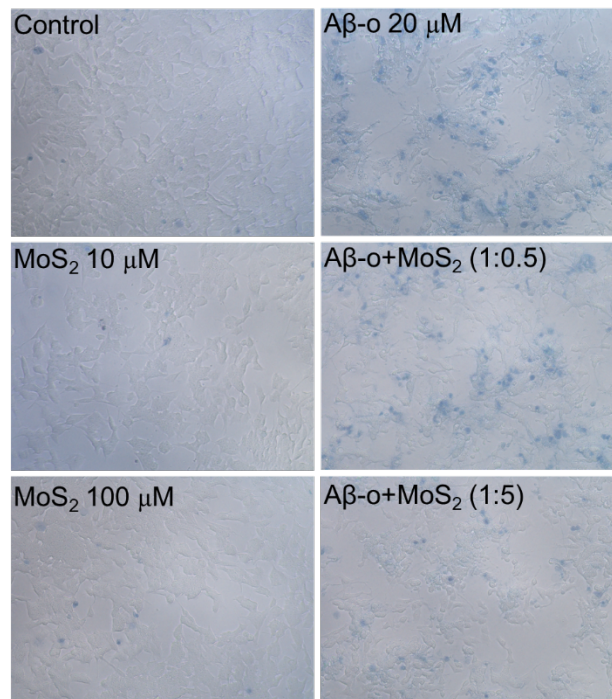

**Figure S2.** Trypan blue staining of SH-S5Y cells after 48 h treatment by A $\beta$ -o, ultrasmall MoS<sub>2</sub> QDs and the combination of A $\beta$ -o and ultrasmall MoS<sub>2</sub> QDs at the molar ratios of 1:0.5 and 1:5. A $\beta$  was preincubated at 400  $\mu$ M and 37  $^{\circ}$ C in MilliQ water for 5 h, and then diluted to 20  $\mu$ M for the cell viability assay.

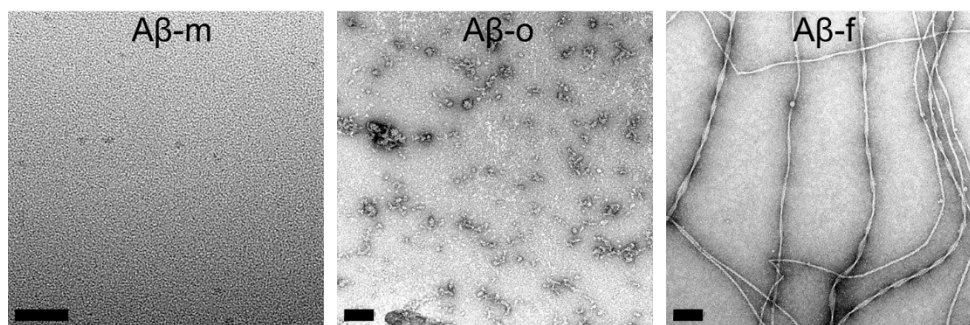

**Figure S3.** TEM imaging of A $\beta$  aggregation, in the forms of A $\beta$ -m, A $\beta$ -o and A $\beta$ -f. 50  $\mu$ M of A $\beta$  peptide was incubated at 37  $^{\circ}$ C for 0 h, 12 h and 30 h. Amyloid protein samples were collected at different time points according to the ThT result presented in Figure 2A and were instantly stained on formvar/carbon-coated copper grids. Scale bars: 50 nm for the image of A $\beta$ -m and 100 nm for the images of A $\beta$ -o and A $\beta$ -f.

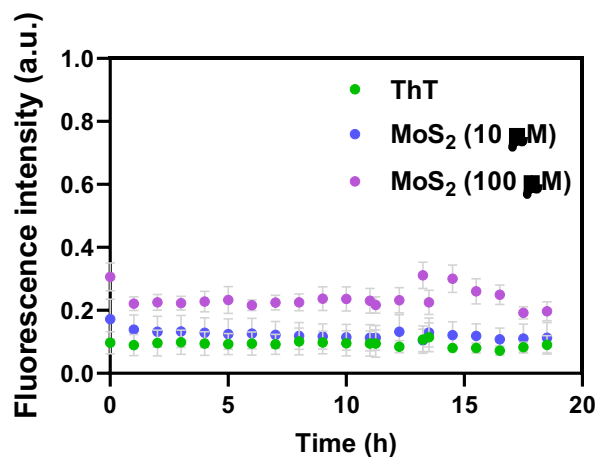

**Figure S4.** ThT kinetic assay for different concentrations of ultrasmall MoS<sub>2</sub> QDs. The concentration of ThT was 200 μM.

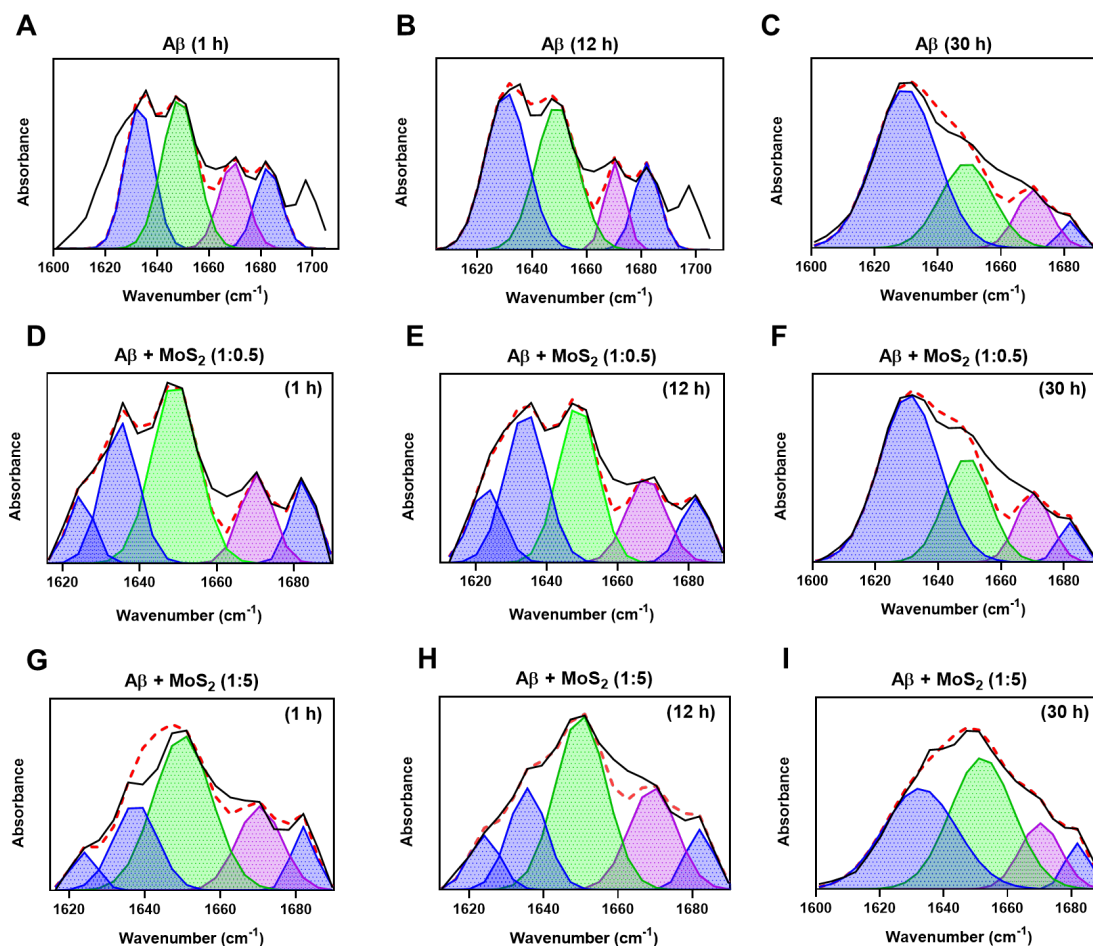

**Figure S5.** ATR-FTIR amide I band spectra and deconvolution analysis of incubated Aβ samples (50 μM, incubated for 1, 12 and 30 h at 37 °C) with or without ultrasmall MoS<sub>2</sub> QDs at the molar ratios of 1:0.5 and 1:5.

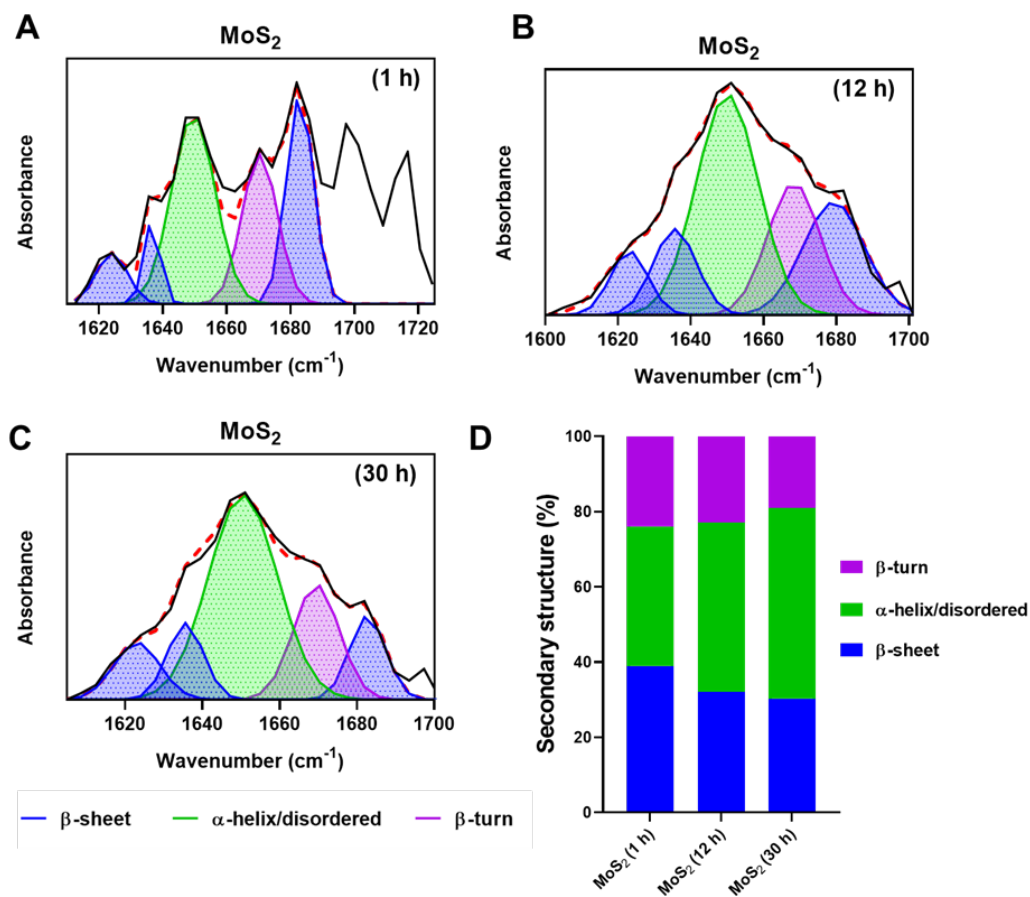

**Figure S6.** ATR-FTIR amide I band spectra (A, B, C) and the secondary structure distribution (D) of ultrasmall MoS<sub>2</sub> QDs only without A $\beta$  at 1, 12 and 30 h and 37 °C in water.

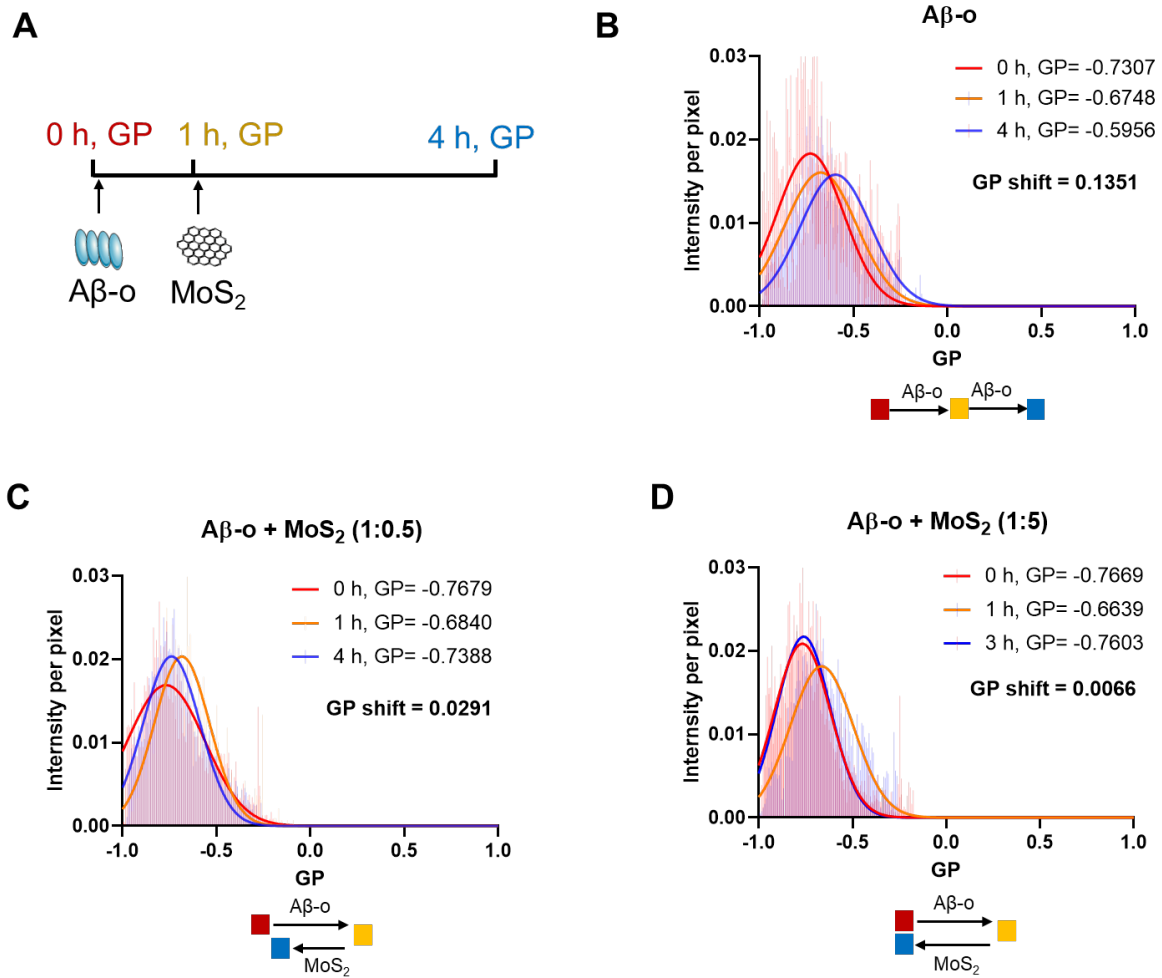

**Figure S7. Effects of pre-incubated Aβ-o on the fluidity of SH-SY5Y cell membranes in the presence and absence of ultras-small MoS<sub>2</sub> QDs.** (A) A flowchart illustrates the measurement time points of membrane fluidity and the addition of Aβ-o and ultras-small MoS<sub>2</sub> QDs. (B-D) GP shifts were recorded after 1 h pre-treatment with Aβ-o (20 μM) followed by another 3 h of incubation in the presence and absence of ultras-small MoS<sub>2</sub> QDs (10 or 100 μM).

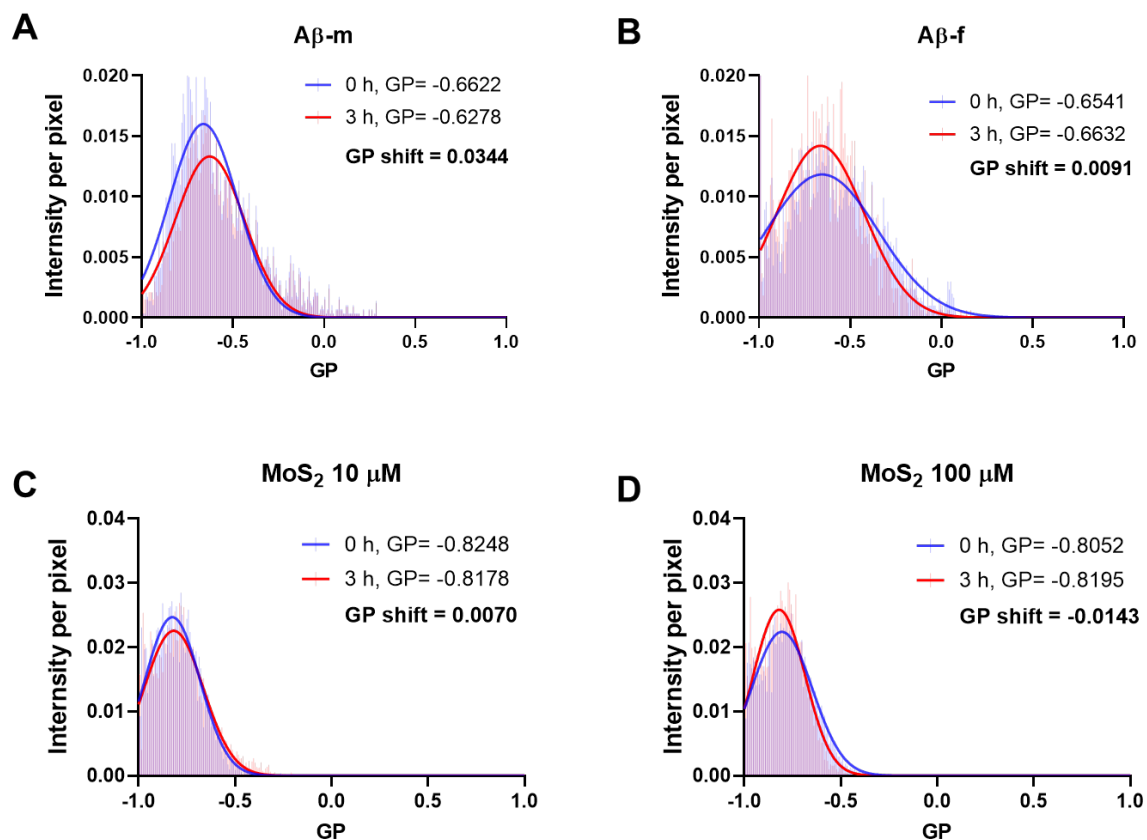

**Figure S8.** Effects of  $A\beta$ -m,  $A\beta$ -f and ultras-small  $MoS_2$  QDs on the membrane fluidity of SH-SY5Y cells.  $A\beta$  400  $\mu$ M was dissolved in  $H_2O$  and incubated at 37  $^\circ$ C for 0, 5 and 30 h, representing  $A\beta$ -m,  $A\beta$ -o and  $A\beta$ -f, then was further diluted into cell culture media to reach 20  $\mu$ M final concentration. After 3 h treatment, GP values and shifts were analyzed.

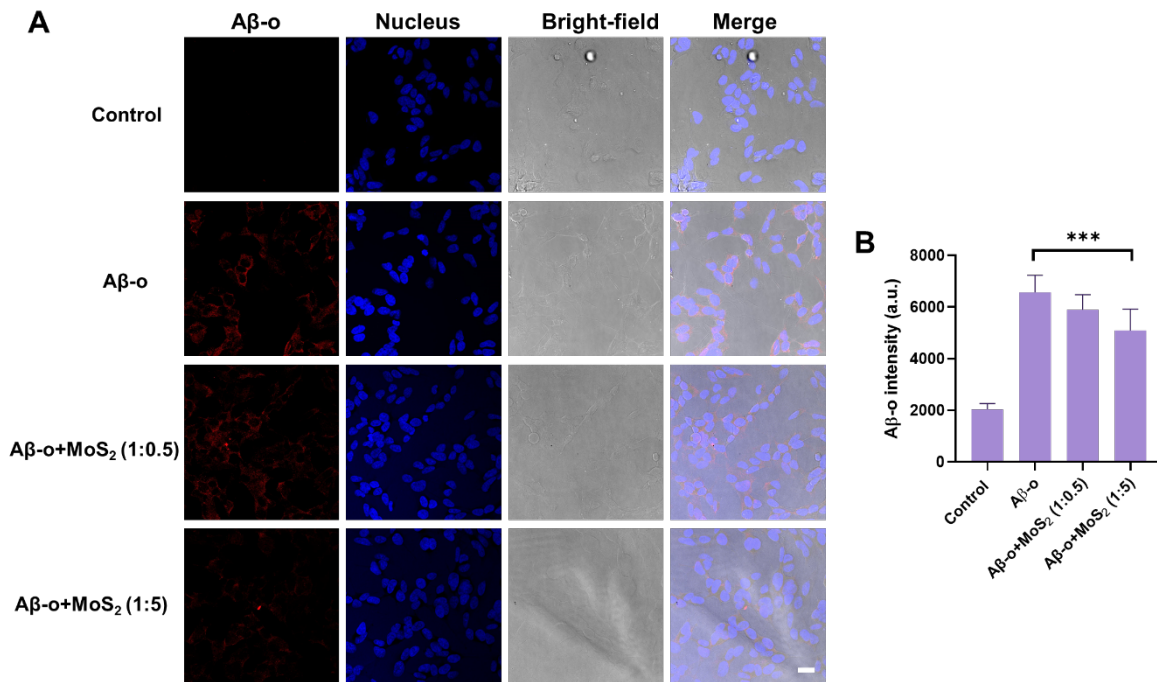

**Figure S9. A $\beta$ -o distribution on SH-SY5Y cells in the presence and absence of ultrasmall MoS<sub>2</sub> QDs with the molar ratios of 1:0.5 and 1:5.** (A) Confocal images of A $\beta$ -o (concentration: 20  $\mu$ M) distribution after 3 h treatment, including A $\beta$ -o (red), nucleus (blue), bright-field (gray) and merged images for 3 channels. Scale bar: 20  $\mu$ m. (B) Corresponding A $\beta$ -o fluorescence intensity of panel A. Data are shown as mean values ( $n=3$ )  $\pm$  SEM, \*\*\*  $P < 0.001$ .

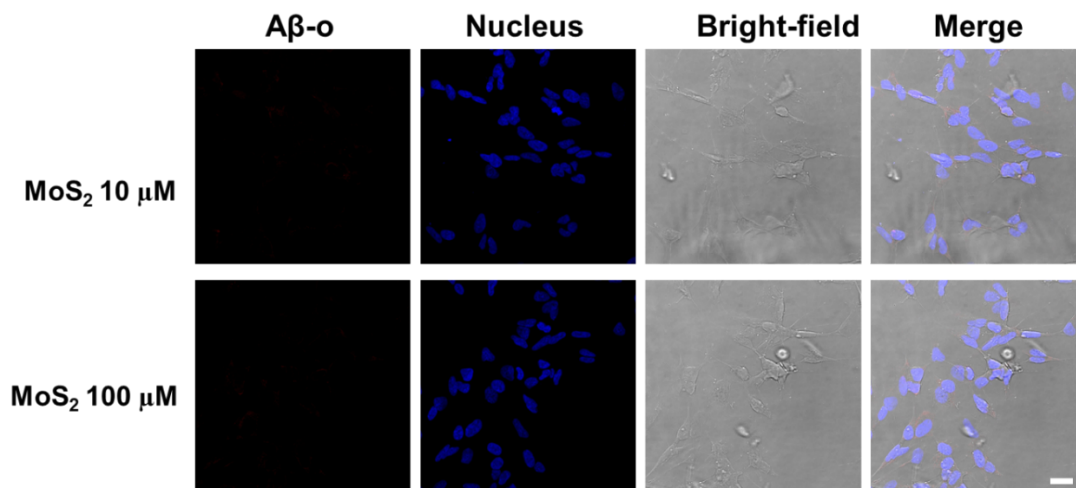

**Figure S10. A $\beta$ -o distribution on SH-SY5Y cells treated with 10 and 100  $\mu$ M of ultrasmall MoS<sub>2</sub> QDs.** A $\beta$ -o (red), nucleus (blue), bright-field (gray) and merged images for 3 channels. Scale bar: 20  $\mu$ m.



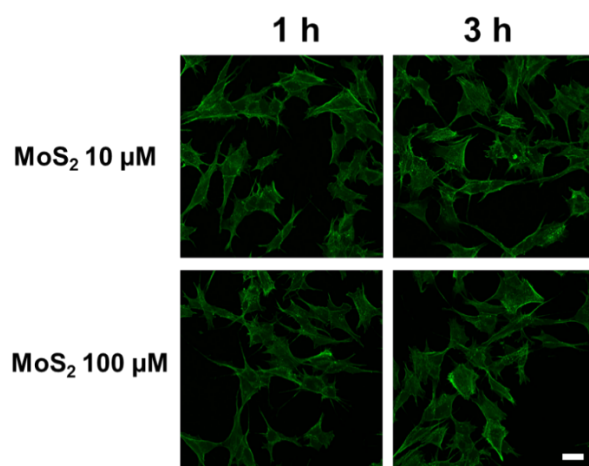

**Figure S11. Actin organization in SH-SY5Y cells after 1 h and 3 h treatment by different concentrations of ultras-small MoS<sub>2</sub> QDs.** Actin filaments were stained by phalloidin-iFluor 488 (green). Scale bar: 20 μm.

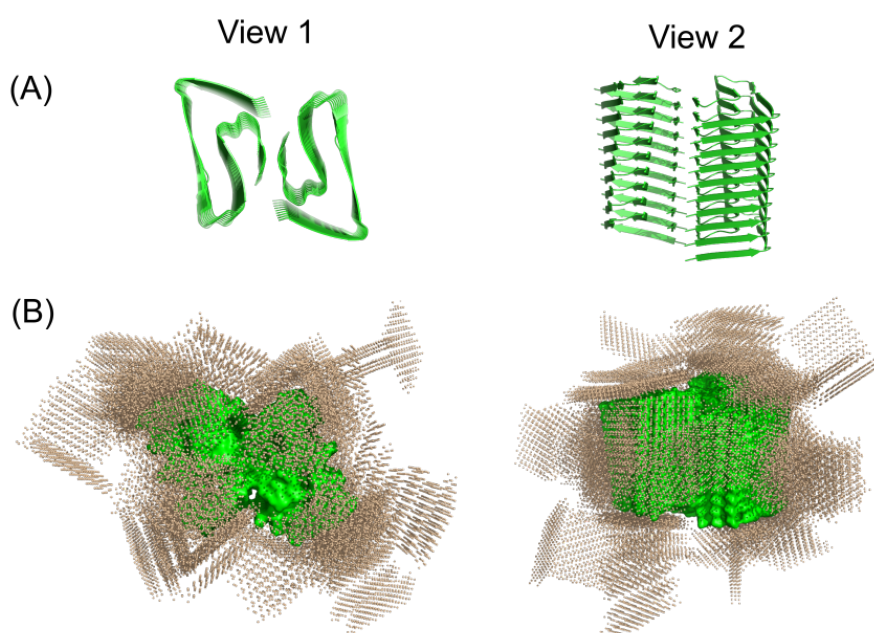

**Figure S12. Interactions between Aβ-f and ultras-small MoS<sub>2</sub> QDs.** (A) Structure of the Aβ fibril (Aβ-f). Aβ peptides were shown as cartoons. (B) Overlaying of final snapshots from 30 independent simulations, where preformed Aβ-f were illustrated by their surfaces and MoS<sub>2</sub> atoms were displayed in wheat spheres.

**Table S1. Secondary structure distribution of incubated (1, 12 and 30 h) A $\beta$  50  $\mu$ M in the presence and absence of ultrasmall MoS<sub>2</sub> QDs.** Secondary structure analysis (%) is derived after deconvolution of the respective ATR-FTIR raw spectra presented in **Figures S5&S6** in 4 peak regions (1610~1640 cm<sup>-1</sup>, 1640~1660 cm<sup>-1</sup>, 1660~1675 cm<sup>-1</sup>, and 1675~690 cm<sup>-1</sup>). Incubation temperature: 37 °C.

| Samples                                    | $\beta$ -sheet (%) | $\alpha$ -helix/disordered (%) | $\beta$ -turn (%) |
|--------------------------------------------|--------------------|--------------------------------|-------------------|
| A $\beta$ (1 h)                            | 44.7               | 37.7                           | 17.6              |
| A $\beta$ (12 h)                           | 52.8               | 36.4                           | 10.8              |
| A $\beta$ (30 h)                           | 61.6               | 26.5                           | 11.9              |
| A $\beta$ + MoS <sub>2</sub> (1:0.5, 1 h)  | 44.3               | 41.3                           | 14.4              |
| A $\beta$ + MoS <sub>2</sub> (1:0.5, 12 h) | 52.2               | 31.1                           | 16.7              |
| A $\beta$ + MoS <sub>2</sub> (1:0.5, 30 h) | 60.4               | 26.5                           | 13.1              |
| A $\beta$ + MoS <sub>2</sub> (1:5, 1 h)    | 32.9               | 47.2                           | 19.9              |
| A $\beta$ + MoS <sub>2</sub> (1:5, 12 h)   | 34.7               | 42.2                           | 23.1              |
| A $\beta$ + MoS <sub>2</sub> (1:5, 30 h)   | 43.6               | 42.6                           | 13.8              |
| MoS <sub>2</sub> (1 h)                     | 39                 | 37.1                           | 23.9              |
| MoS <sub>2</sub> (12 h)                    | 32.1               | 45                             | 22.9              |
| MoS <sub>2</sub> (30 h)                    | 30.3               | 50.7                           | 19                |
